# Supplementary material for: A trade-off between migration and association energies for hydride-ion conductivity in the SrLiH3–CaLiH3–NaLiH2 system
Source: Royal Society of Chemistry journal article supplement (doi:10.1039/d4dt03384a), 2025-01-01
Supplement: d4dt03384a1.pdf [file d4dt03384a1.pdf]

## Electronic Supplementary Information

### A trade-off between migration and association energies for hydride-ion conductivity in the SrLiH<sub>3</sub>–CaLiH<sub>3</sub>–NaLiH<sub>2</sub> system

Takashi Hirose,<sup>a</sup> Naoki Matsui,<sup>\*b</sup> Kenta Watanabe,<sup>a,b</sup> Takashi Saito,<sup>c,d</sup> Kazuhiro Mori,<sup>c</sup> Kota Suzuki,<sup>b</sup> Masaaki Hirayama<sup>\*a,b</sup> and Ryoji Kanno<sup>\*b</sup>

<sup>a</sup>Department of Chemical Science and Engineering, School of Materials and Chemical Technology, Institute of Science Tokyo, 4259 Nagatsuta, Midori-ku, Yokohama 226–8501, Japan

<sup>b</sup>Research Center for All–Solid–State Battery, Institute of Integrated Research, Institute of Science Tokyo, 4259 Nagatsuta, Midori-ku, Yokohama 226–8501, Japan

<sup>c</sup>Neutron Science Division (KENS), Institute of Materials Structure Science, High Energy Accelerator Research Organization (KEK), 203–1 Shirakata, Tokai, Ibaraki 319–1106, Japan

<sup>d</sup>Department of Materials Structure Science, School of High Energy Accelerator Science, The Graduate University for Advanced Studies, SOKENDAI, 203–1 Shirakata, Tokai, Ibaraki 319–1106, Japan

\*Corresponding author.

Email: Naoki Matsui, matsui.n.ee49@m.isct.ac.jp

Masaaki Hirayama, hirayama@mac.titech.ac.jp

Ryoji Kanno, kanno.r.ade9@m.isct.ac.jp

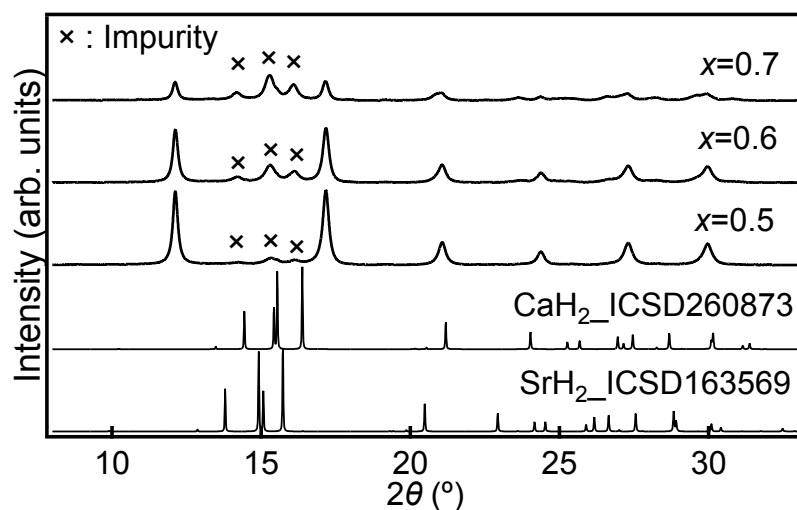

**Figure S1.** Impurities of  $\text{Sr}_{1-x}\text{Ca}_x\text{LiH}_3$  ( $0.5 \leq x \leq 0.7$ ).

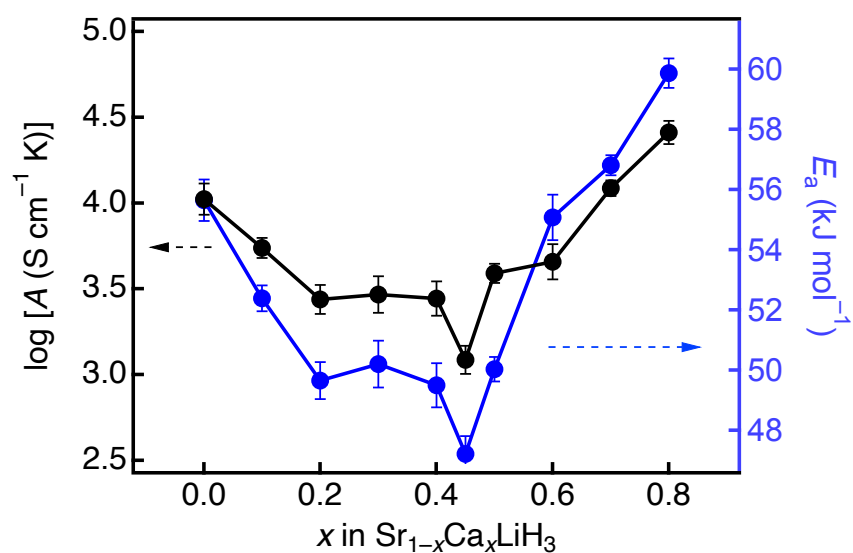

**Figure S2.** The pre-exponential factor and activation energy versus Ca amount in  $\text{Sr}_{1-x}\text{Ca}_x\text{LiH}_3$ .

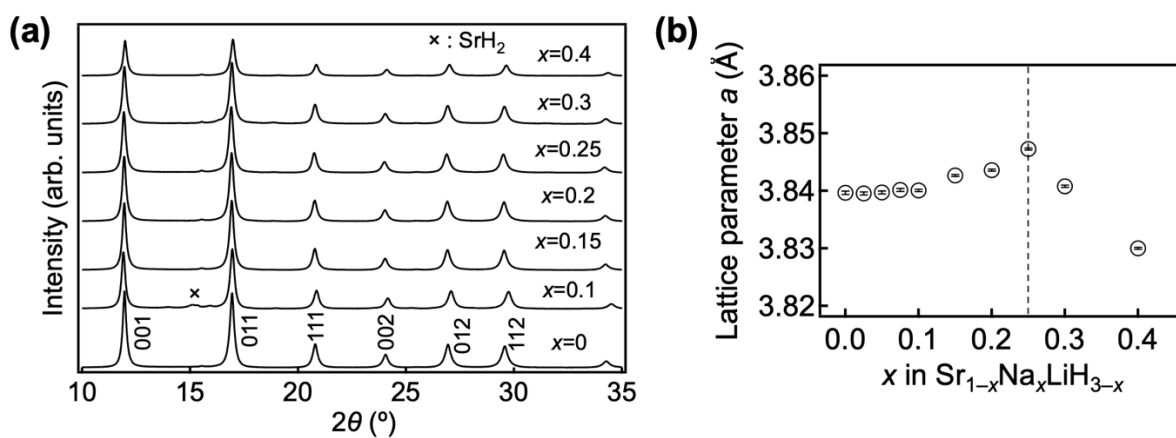

**Figure S3.** (a) Synchrotron XRD patterns and (b) lattice parameters of  $\text{Sr}_{1-x}\text{Na}_x\text{LiH}_{3-x}$  ( $0 \leq x \leq 0.4$ ) samples ball milled for 12 hours.

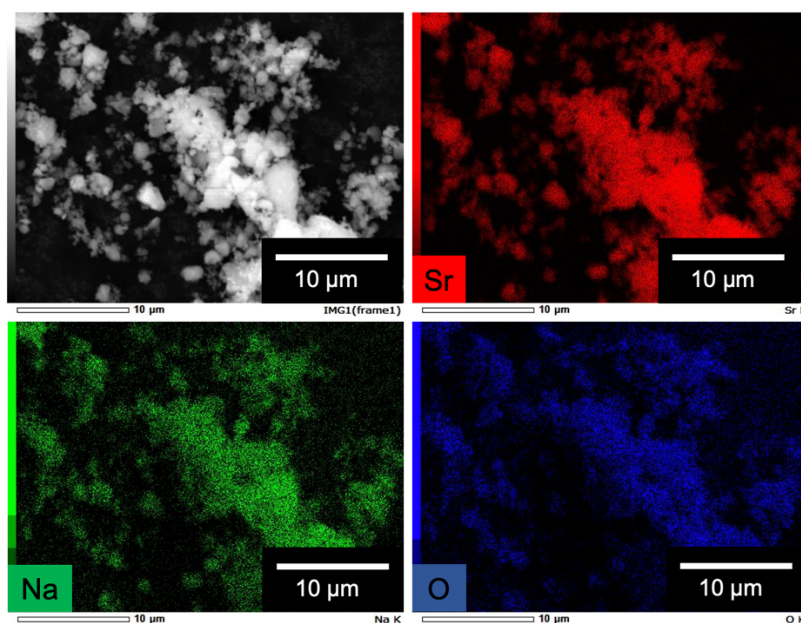

**Figure S4.** SEM image and EDX mapping of  $\text{Sr}_{0.8}\text{Na}_{0.2}\text{LiH}_{2.8}$ .

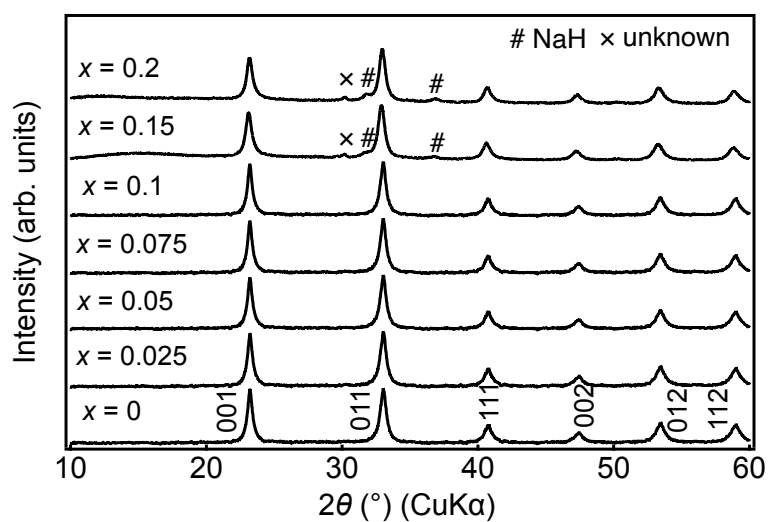

**Figure S5.** XRD patterns of  $\text{Sr}_{1-x}\text{Na}_x\text{LiH}_{3-x}$  samples ball milled for 3 hours. The results for  $0 \leq x \leq 0.1$  were cited from the previous study.<sup>1</sup>

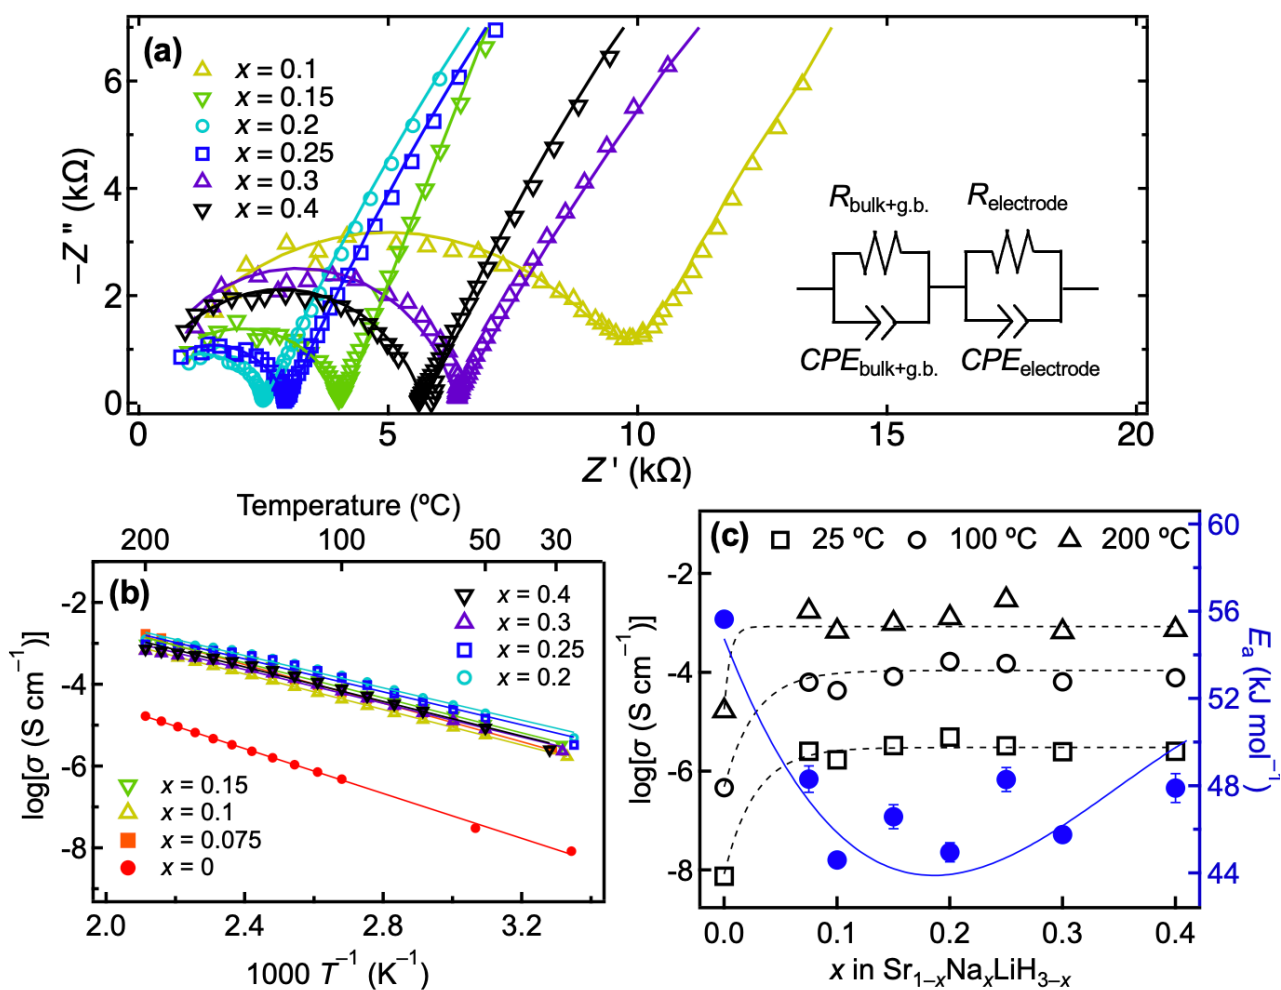

**Figure S6.** (a) Nyquist plots of  $\text{Sr}_{1-x}\text{Na}_x\text{LiH}_{3-x}$  ( $0.1 \leq x \leq 0.4$ ) at 100 °C. The inset shows the equivalent circuit used for fitting. (b) Arrhenius plots of the total ionic conductivity for  $\text{Sr}_{1-x}\text{Na}_x\text{LiH}_{3-x}$  ( $0.1 \leq x \leq 0.4$ ) samples. (c) Ionic conductivity and activation energy versus nominal Na amount in  $\text{Sr}_{1-x}\text{Na}_x\text{LiH}_{3-x}$ . The activation energy is shown as blue circles against the right axis.

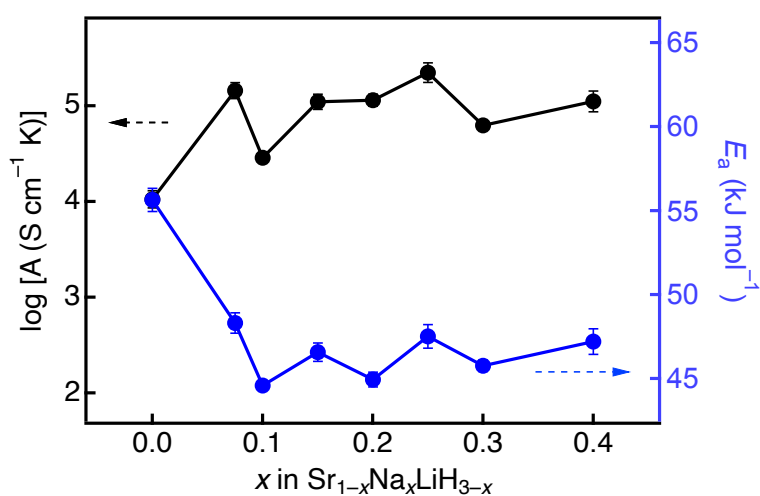

**Figure S7.** The pre-exponential factor and activation energy versus Na amount in  $\text{Sr}_{1-x}\text{Na}_x\text{LiH}_{3-x}$ .

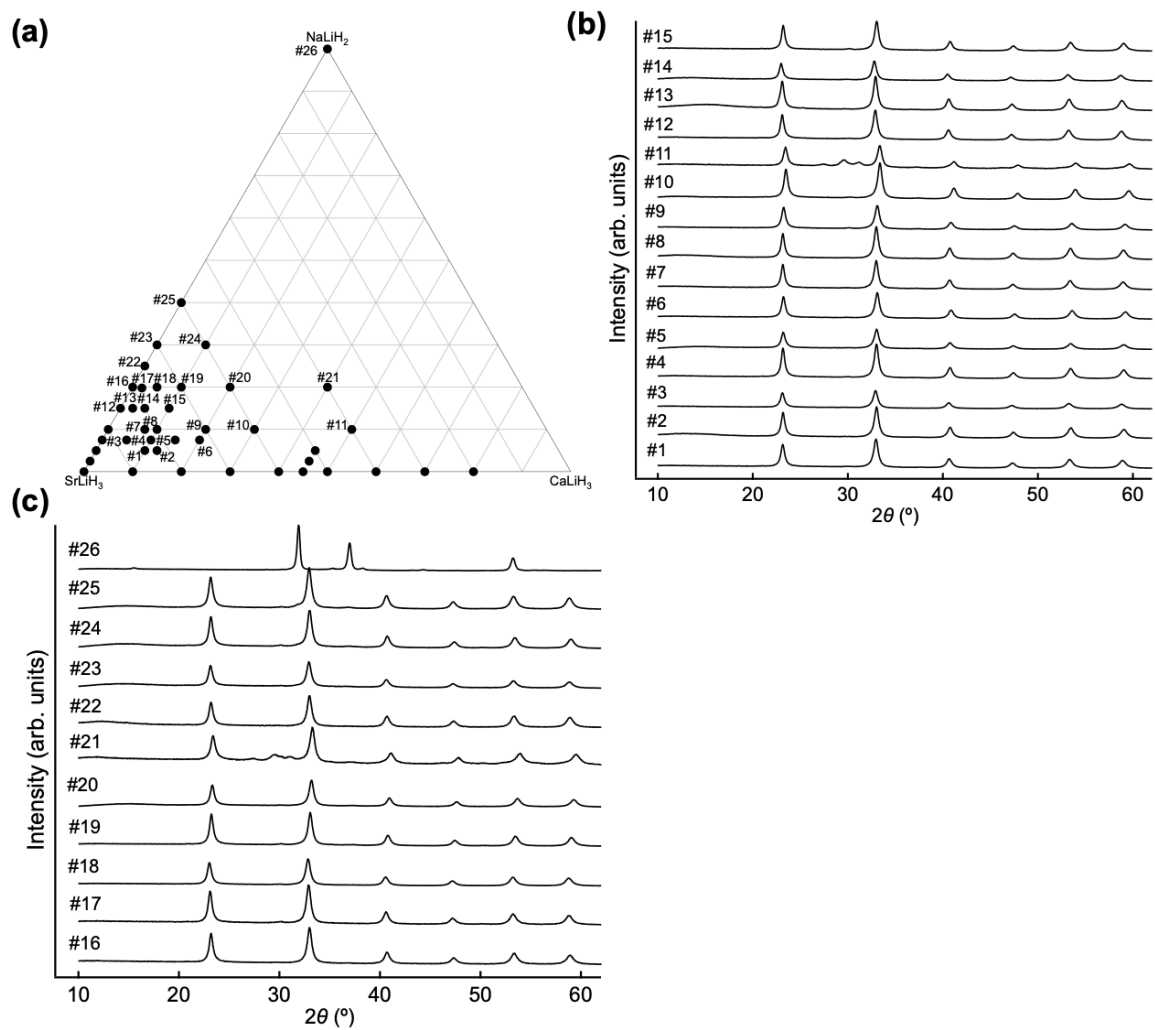

**Figure S8.** (a) Synthesised compositions are indicated by the black points in the  $\text{SrLiH}_3$ - $\text{CaLiH}_3$ - $\text{NaLiH}_2$  pseudo-ternary diagram. The XRD patterns of the samples (b) No. 1–15 and (c) No. 16–26.

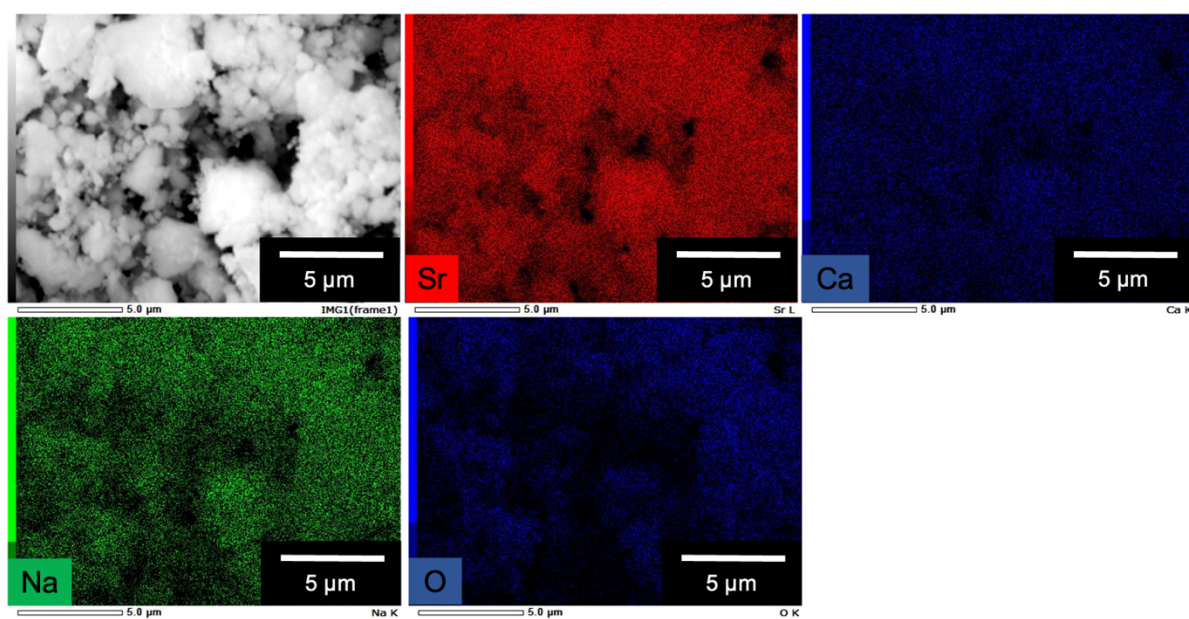

**Figure S9.** SEM image and EDX mapping of  $\text{Sr}_{0.7}\text{Ca}_{0.1}\text{Na}_{0.2}\text{LiH}_{2.8}$ .

**Table S1.** Several perovskite-type hydride-ion conductors showing high performance in the SrLiH<sub>3</sub>–CaLiH<sub>3</sub>–NaLiH<sub>2</sub> pseudo-ternary system and their ionic conductivities and activation energies.

| composition                                                                    | $\sigma_{\text{r.t.}}$ [S cm <sup>-1</sup> ] | $\sigma_{100\text{ }^\circ\text{C}}$ [S cm <sup>-1</sup> ] | $E_a$ [kJ mol <sup>-1</sup> ] |
|--------------------------------------------------------------------------------|----------------------------------------------|------------------------------------------------------------|-------------------------------|
| <b>Sr<sub>0.8</sub>Na<sub>0.2</sub>LiH<sub>2.8</sub></b>                       | $5.1 \times 10^{-6}$                         | $1.7 \times 10^{-4}$                                       | 45.0                          |
| <b>Sr<sub>0.7</sub>Ca<sub>0.1</sub>Na<sub>0.2</sub>LiH<sub>2.8</sub></b>       | $4.2 \times 10^{-6}$                         | $4.6 \times 10^{-5}$                                       | 45.1                          |
| <b>Sr<sub>0.75</sub>Ca<sub>0.1</sub>Na<sub>0.15</sub>LiH<sub>2.85</sub></b>    | $3.7 \times 10^{-6}$                         | $1.2 \times 10^{-4}$                                       | 47.0                          |
| <b>Sr<sub>0.78</sub>Ca<sub>0.02</sub>Na<sub>0.2</sub>LiH<sub>2.8</sub></b>     | $3.7 \times 10^{-6}$                         | $1.1 \times 10^{-4}$                                       | 43.8                          |
| <b>Sr<sub>0.825</sub>Ca<sub>0.075</sub>Na<sub>0.1</sub>LiH<sub>2.9</sub></b>   | $3.5 \times 10^{-6}$                         | $1.1 \times 10^{-4}$                                       | 45.5                          |
| <b>Sr<sub>0.925</sub>Na<sub>0.075</sub>LiH<sub>2.925</sub></b>                 | $1.9 \times 10^{-6}$                         | $6.4 \times 10^{-5}$                                       | 46.3                          |
| <b>Sr<sub>0.825</sub>Ca<sub>0.025</sub>Na<sub>0.15</sub>LiH<sub>2.85</sub></b> | $7.0 \times 10^{-7}$                         | $1.7 \times 10^{-5}$                                       | 41.8                          |
| <b>Sr<sub>0.725</sub>Ca<sub>0.2</sub>Na<sub>0.075</sub>LiH<sub>2.925</sub></b> | $3.4 \times 10^{-7}$                         | $3.2 \times 10^{-5}$                                       | 43.8                          |

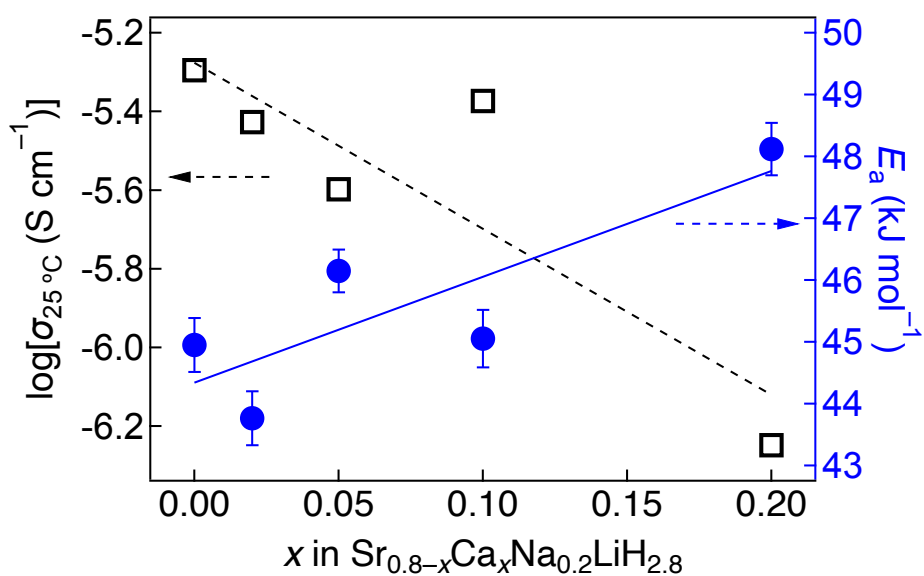

**Figure S10.** Plot of ionic conductivity at 25 °C and activation energy versus Ca dopant amount in Sr<sub>0.8-x</sub>Ca<sub>x</sub>Na<sub>0.2</sub>LiH<sub>2.8</sub>.

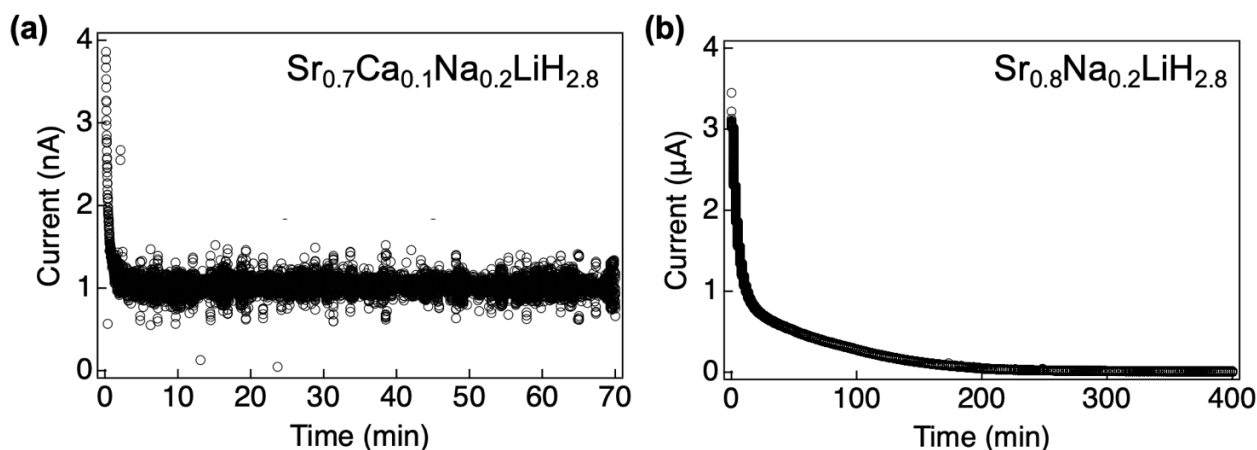

**Figure S11.** Time variation of the current change at an applied voltage of 50 mV using a Mo|SE|Mo symmetric cell obtained by direct current (DC) measurement at 50 °C; (a)  $\text{Sr}_{0.7}\text{Ca}_{0.1}\text{Na}_{0.2}\text{LiH}_{2.8}$  and (b)  $\text{Sr}_{0.8}\text{Na}_{0.2}\text{LiH}_{2.8}$ .

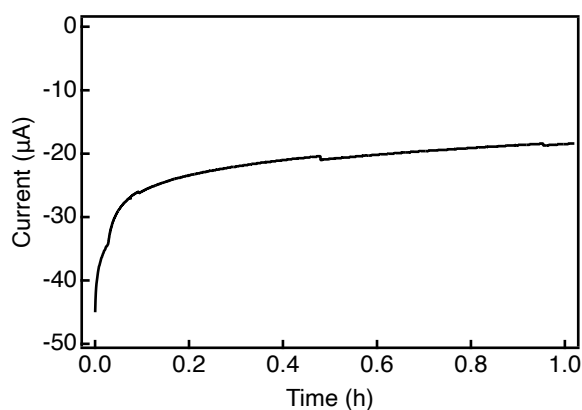

**Figure S12.** Current vs. Time curve from DC polarization measurements using a  $(-)\text{Mo}|\text{Ti}+\text{TiH}_2+\text{Sr}_{0.8}\text{Na}_{0.2}\text{LiH}_{2.8}+\text{AB}|\text{Sr}_{0.8}\text{Na}_{0.2}\text{LiH}_{2.8}|\text{TiH}_2+\text{Sr}_{0.8}\text{Na}_{0.2}\text{LiH}_{2.8}+\text{AB}|\text{Mo}(+)$  cell at 50 °C. The relaxation time was 1 hour. The applied voltage was  $-0.3$  V vs. OCV. The Ti composite electrode or Ti/TiH<sub>2</sub> composite electrode was synthesized under the conditions of 100 rpm for 8 hours with weight ratios of  $\text{TiH}_2:\text{SE}:\text{AB} = 20:75:5$  wt.% and  $\text{Ti}:\text{TiH}_2:\text{SE}:\text{AB} = 12:8:75:5$  wt.%, respectively.

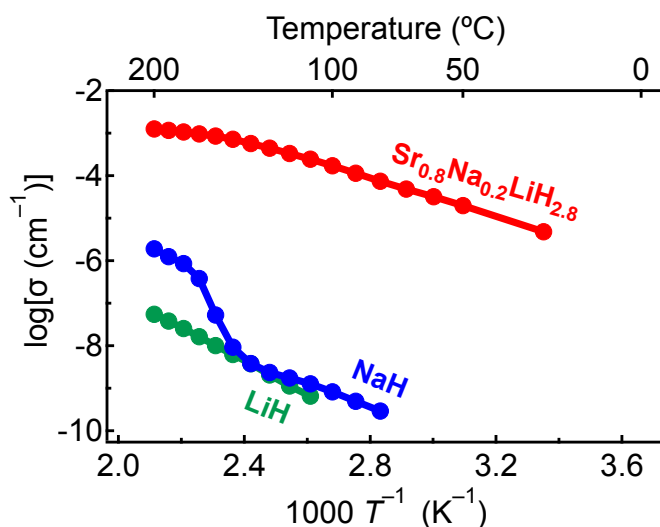

**Figure S13.** Arrhenius plots of  $\text{Sr}_{0.8}\text{Na}_{0.2}\text{LiH}_{2.8}$ , LiH, and NaH.



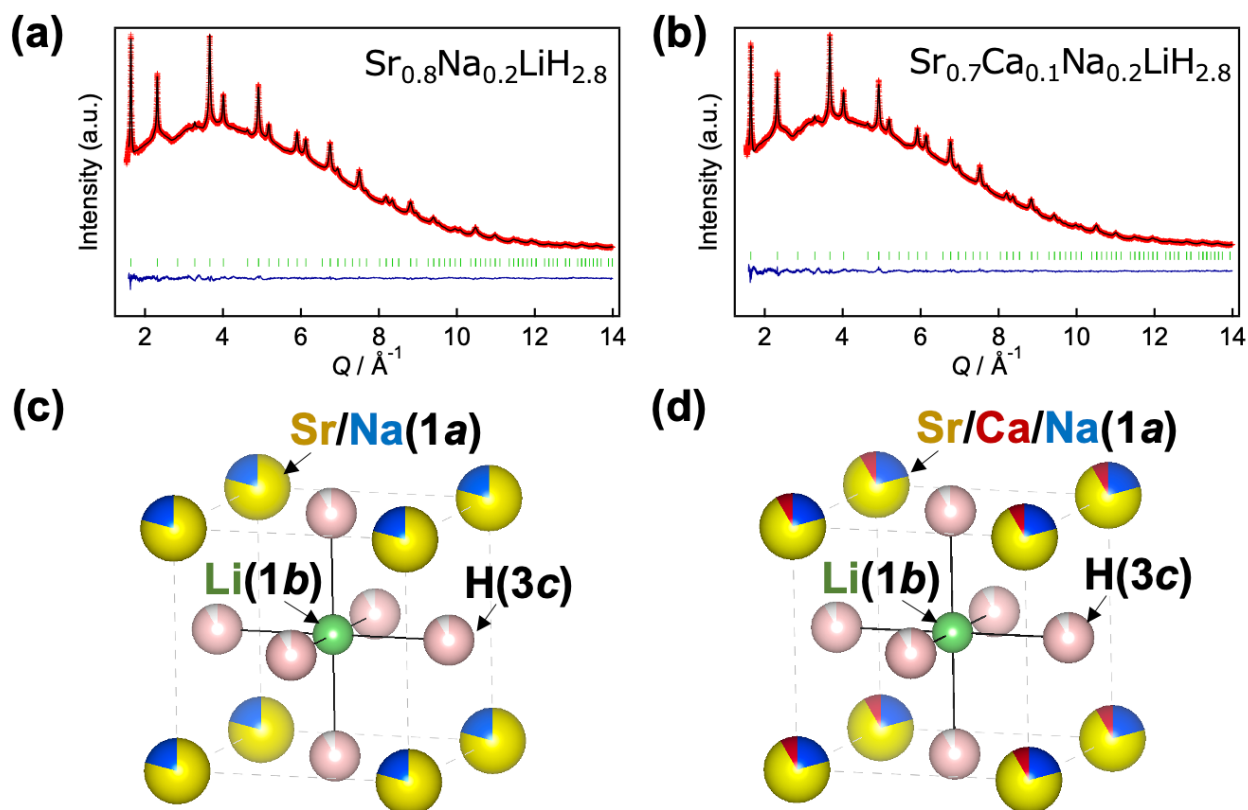

**Figure S14.** Neutron Rietveld refinement profiles of (a)  $\text{Sr}_{0.8}\text{Na}_{0.2}\text{LiH}_{2.8}$  and (b)  $\text{Sr}_{0.7}\text{Ca}_{0.1}\text{Na}_{0.2}\text{LiH}_{2.8}$ . The refined structure of (c)  $\text{Sr}_{0.8}\text{Na}_{0.2}\text{LiH}_{2.8}$  and (d)  $\text{Sr}_{0.7}\text{Ca}_{0.1}\text{Na}_{0.2}\text{LiH}_{2.8}$ .

**Table S2.** Rietveld refinement results of Neutron diffraction patterns of (a)  $\text{Sr}_{0.8}\text{Na}_{0.2}\text{LiH}_{2.8}$  and (b)  $\text{Sr}_{0.7}\text{Ca}_{0.1}\text{Na}_{0.2}\text{LiH}_{2.8}$ .

(a)  $\text{Sr}_{0.8}\text{Na}_{0.2}\text{LiH}_{2.8}$

| Atom | Site | $g$               | $x$ | $y$ | $z$ | $B_{\text{eq}} / \text{\AA}^2$ | $B_{11} / \text{\AA}^2$ | $B_{22} / \text{\AA}^2$ | $B_{33} / \text{\AA}^2$ |
|------|------|-------------------|-----|-----|-----|--------------------------------|-------------------------|-------------------------|-------------------------|
| Sr   | 1a   | 0.819(11)         | 0   | 0   | 0   | 0.38(2)                        | 0.38(2)                 | $=U_{11}(\text{Sr})$    | $=U_{11}(\text{Sr})$    |
| Na   | 1a   | $=1-g(\text{Sr})$ | 0   | 0   | 0   | 0.38(2)                        | $=U_{11}(\text{Sr})$    | $=U_{11}(\text{Sr})$    | $=U_{11}(\text{Sr})$    |
| Li   | 1b   | 1                 | 0.5 | 0.5 | 0.5 | 0.84(3)                        | 0.84(3)                 | $=U_{11}(\text{Li})$    | $=U_{11}(\text{Li})$    |
| H    | 3c   | 0.930(8)          | 0.5 | 0.5 | 0   | 2.30(4)                        | 2.46(7)                 | $=U_{11}(\text{H})$     | 1.98(5)                 |

Unit cell: Cubic  $Pm\bar{3}m$  (221);  $a = b = c = 3.83868(3) \text{ \AA}$ ,  $V = 56.5296(13) \text{ \AA}^3$ ;  $R_{\text{wp}} = 0.426\%$ ,  $R_e = 0.19\%$ ,  $R_p = 0.32\%$ ,  $R_B = 1.87\%$ ,  $R_F = 2.22\%$ , goodness of fit  $S = R_{\text{wp}}/R_e = 2.19$ .

(b)  $\text{Sr}_{0.7}\text{Ca}_{0.1}\text{Na}_{0.2}\text{LiH}_{2.8}$

| Atom | Site | $g$       | $x$ | $y$ | $z$ | $B_{\text{eq}} / \text{\AA}^2$ | $B_{11} / \text{\AA}^2$ | $B_{22} / \text{\AA}^2$ | $B_{33} / \text{\AA}^2$ |
|------|------|-----------|-----|-----|-----|--------------------------------|-------------------------|-------------------------|-------------------------|
| Sr   | 1a   | 0.703(5)  | 0   | 0   | 0   | 0.47(3)                        | 0.47(3)                 | $=U_{11}(\text{Sr})$    | $=U_{11}(\text{Sr})$    |
| Ca   | 1a   | 0.106(18) | 0   | 0   | 0   | 0.47(3)                        | $=U_{11}(\text{Sr})$    | $=U_{11}(\text{Sr})$    | $=U_{11}(\text{Sr})$    |
| Na   | 1a   | 0.192(24) | 0   | 0   | 0   | 0.47(3)                        | $=U_{11}(\text{Sr})$    | $=U_{11}(\text{Sr})$    | $=U_{11}(\text{Sr})$    |
| Li   | 1b   | 1         | 0.5 | 0.5 | 0.5 | 0.85(3)                        | 0.85(3)                 | $=U_{11}(\text{Li})$    | $=U_{11}(\text{Li})$    |
| H    | 3c   | 0.936(14) | 0.5 | 0.5 | 0   | 2.34(4)                        | 2.88(8)                 | $=U_{11}(\text{H})$     | 1.25(6)                 |

Unit cell: Cubic  $Pm\bar{3}m$  (221);  $a = b = c = 3.82772(3) \text{ \AA}$ ,  $V = 56.0404(13) \text{ \AA}^3$ ;  $R_{\text{wp}} = 0.378\%$ ,  $R_e = 0.20\%$ ,  $R_p = 0.28\%$ ,  $R_B = 1.93\%$ ,  $R_F = 3.67\%$ , goodness of fit  $S = R_{\text{wp}}/R_e = 1.88$ .



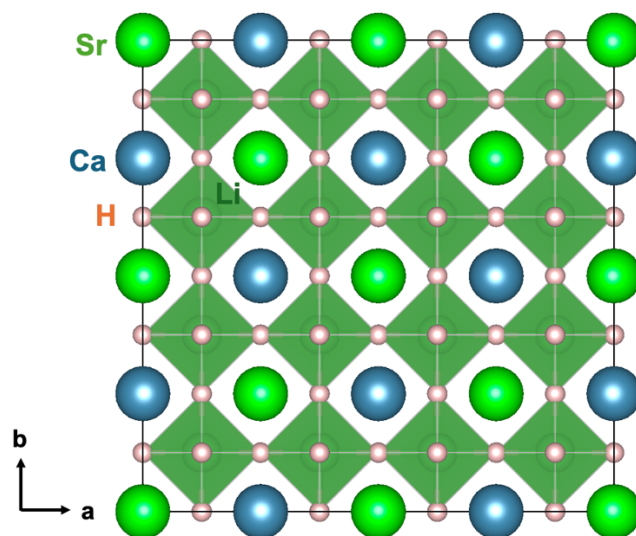

**Figure S15.** The crystal structure of  $\text{Sr}_{0.5}\text{Ca}_{0.5}\text{LiH}_3$  used in the theoretical calculations.

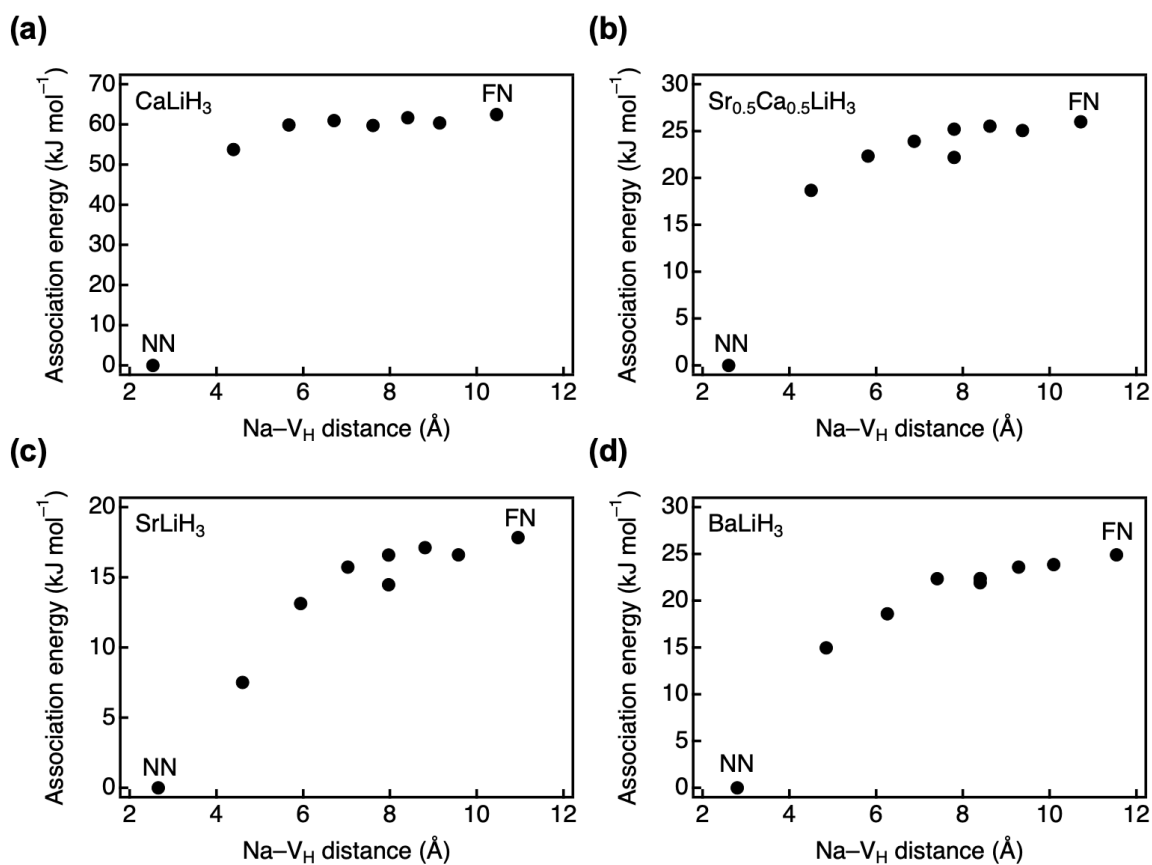

**Figure S16.** The association energy of (a) $\text{CaLiH}_3$ , (b) $\text{Sr}_{0.5}\text{Ca}_{0.5}\text{LiH}_3$ , (c) $\text{SrLiH}_3$ , and (d) $\text{BaLiH}_3$ .

## References

1. T. Hirose, T. Mishina, N. Matsui, K. Suzuki, T. Saito, T. Kamiyama, M. Hirayama and R. Kanno, *ACS Appl. Energy Mater.*, 2022, **5**, 2968-2974.
